# Supplementary material for: Male-specific age estimation based on Y-chromosomal DNA methylation
Source: Aging (Albany NY). 2021 Mar 11;13(5):6442–58. doi: 10.18632/aging.202775 (PMC7993701; doi:10.18632/aging.202775)
Supplement: Supplementary Table 1 [file aging-13-202775-s002.xlsx]

## Sheet: Blad1
Supplementary Table 1. Annotation and age predictive information of all 75 Y-CpGs included in our study.
CpG site	Chromosome	Position	Strand	Probe Type	CpG Island	Relation to CpG Island	UCSC Reference Gene Name	UCSC Reference Gene Group	ρ (Spearman Correlation Coefficient) at different datasets			Adjsuted p-value (Bonferroni)	Lasso regression (32 Y-CpGs)	Elastic net regression (33 Y-CpGs)	Random Forest Cross-Validation (19 Y-CpGs)	Bayesian Information Criterion (19 Y-CpGs)
									All	Training+Validation	Testing	Training+Validation
cg13654344	chrY	2654978	+	II	chrY:2657802-2658099	N_Shelf	SRY;SRY	3'UTR;1stExon	-0.0284084	-0.0560079	0.116803	1	Included	Included	Not included	Included
cg15563434	chrY	2657879	+	I	chrY:2657802-2658099	Island			0.108006	0.131245	-0.112205	0.0044691	Included	Included	Included	Included
cg07939587	chrY	2657936	+	I	chrY:2657802-2658099	Island			0.11539	0.12135	0.0121074	0.0155805	Not included	Not included	Included	Not included
cg03767353	chrY	2658057	-	I	chrY:2657802-2658099	Island			0.118161	0.130622	0.0143172	0.00484806	Not included	Not included	Not included	Included
cg14526044	chrY	2802103	-	II	chrY:2802964-2804283	N_Shore	ZFY;ZFY;ZFY	TSS1500;TSS1500;TSS1500	-0.063447	-0.0383748	-0.23205	1	Not included	Not included	Not included	Not included
cg14170959	chrY	2802217	+	II	chrY:2802964-2804283	N_Shore	ZFY;ZFY;ZFY	TSS1500;TSS1500;TSS1500	0.159531	0.166117	0.139075	2.62246e-05	Included	Included	Not included	Included
cg13805219	chrY	6137453	-	II	chrY:6133645-6133958	S_Shelf			-0.00842897	-0.0146812	0.0843441	1	Included	Included	Not included	Not included
cg07765982	chrY	6263841	+	II		OpenSea	TTTY1;LOC100101116	Body;Body	-0.0889029	-0.0485097	-0.337532	1	Not included	Not included	Not included	Not included
cg05530472	chrY	6742689	-	II		OpenSea	AMELY	TSS1500	-0.074137	-0.0750844	-0.287329	1	Not included	Not included	Not included	Not included
cg17972491	chrY	6742726	-	II		OpenSea	AMELY	TSS1500	-0.116445	-0.111463	-0.423649	0.0495827	Not included	Not included	Not included	Not included
cg09728865	chrY	6780027	+	II	chrY:6778574-6780028	Island	TBL1Y;TBL1Y;TBL1Y	5'UTR;5'UTR;5'UTR	0.18913	0.201449	0.168011	4.26842e-08	Included	Included	Included	Not included
cg08921682	chrY	6891543	+	I		OpenSea	TBL1Y;TBL1Y;TBL1Y	5'UTR;5'UTR;5'UTR	0.00530458	0.03132	-0.106607	1	Not included	Not included	Included	Not included
cg15700967	chrY	6954228	+	II		OpenSea	TBL1Y;TBL1Y;TBL1Y	Body;Body;Body	-0.0560332	-0.0671911	-0.141294	1	Not included	Not included	Not included	Not included
cg04831594	chrY	8501021	-	II		OpenSea			0.102179	0.0964806	0.159298	0.242077	Not included	Not included	Not included	Not included
cg01828798	chrY	8571457	-	II		OpenSea	TTTY19	TSS1500	-0.0783533	-0.0569199	-0.27628	1	Not included	Not included	Not included	Not included
cg05202434	chrY	8571846	+	II		OpenSea	TTTY19	TSS1500	-0.0105737	-0.0027204	-0.103456	1	Not included	Not included	Not included	Not included
cg01061520	chrY	9478342	-	II	chrY:9478175-9478445	Island			0.109893	0.128173	0.0688487	0.00665026	Not included	Included	Not included	Not included
cg18163559	chrY	9742930	+	II	chrY:9745559-9745993	N_Shelf			0.0142013	0.0188753	0.0988636	1	Not included	Not included	Not included	Not included
cg14210405	chrY	9930240	-	I	chrY:9930123-9930391	Island			0.0267353	-0.00484307	0.121994	1	Not included	Not included	Not included	Not included
cg14720093	chrY	10033382	+	II	chrY:10032933-10034686	Island			0.184537	0.164068	0.322497	3.66351e-05	Included	Included	Included	Included
cg04864270	chrY	13477005	+	II	chrY:13477252-13478448	N_Shore			0.154275	0.161417	0.0712754	5.61102e-05	Included	Included	Not included	Not included
cg01141334	chrY	13477785	+	II	chrY:13477252-13478448	Island			0.115755	0.12855	-0.0345137	0.00633633	Included	Included	Included	Not included
cg03441493	chrY	14074417	+	II	chrY:14074239-14075008	Island			0.149214	0.122363	0.254937	0.0137678	Included	Included	Included	Not included
cg03695421	chrY	14074773	-	I	chrY:14074239-14075008	Island			0.188272	0.186621	0.286415	7.35811e-07	Included	Included	Included	Included
cg02582450	chrY	14075806	+	II	chrY:14075675-14076160	Island			0.135043	0.143475	0.070194	0.000841365	Included	Included	Not included	Included
cg17651935	chrY	14078666	+	II	chrY:14077836-14078044	S_Shore			-0.0698804	-0.0450304	-0.200637	1	Not included	Not included	Not included	Not included
cg00639218	chrY	14096487	+	II	chrY:14100002-14100593	N_Shelf			0.0121012	0.0228241	-0.0409352	1	Not included	Not included	Not included	Not included
cg02107461	chrY	14103651	+	II	chrY:14107137-14107480	N_Shelf			0.0188375	0.0385232	0.0821225	1	Included	Included	Not included	Not included
cg26488634	chrY	14108207	-	II	chrY:14107137-14107480	S_Shore			-0.0156038	0.00416485	-0.0730809	1	Not included	Not included	Not included	Not included
cg14303457	chrY	14537211	+	II	chrY:14532115-14533600	S_Shelf			-0.0935055	-0.0777855	-0.0385525	1	Included	Included	Included	Not included
cg17430262	chrY	14649051	-	II	chrY:14649050-14649669	Island			0.192996	0.213321	0.142756	3.71186e-09	Included	Included	Included	Not included
cg05608794	chrY	14649668	+	II	chrY:14649050-14649669	Island			-0.0191481	-0.0175253	-0.0205043	1	Included	Included	Not included	Included
cg05128824	chrY	15015176	+	II	chrY:15016544-15017298	N_Shore	DDX3Y	TSS1500	-0.0404432	-0.0454683	-0.237393	1	Not included	Not included	Not included	Not included
cg17816615	chrY	15019332	+	II	chrY:15016544-15017298	S_Shelf	DDX3Y;DDX3Y	Body;Body	-0.238565	-0.248355	-0.250573	1.15354e-12	Included	Included	Included	Included
cg07950979	chrY	15451782	+	II		OpenSea	UTY;UTY;UTY	Body;Body;Body	0.126552	0.105306	0.264137	0.0974837	Not included	Not included	Not included	Not included
cg27254225	chrY	15811945	+	II	chrY:15815488-15815779	N_Shelf			-0.149115	-0.128052	-0.293024	0.00675381	Not included	Not included	Not included	Not included
cg26198148	chrY	15814685	+	II	chrY:15815488-15815779	N_Shore	TMSB4Y	TSS1500	0.100963	0.0782626	0.178425	1	Not included	Not included	Not included	Not included
cg14463736	chrY	15817372	+	II	chrY:15815488-15815779	S_Shore	TMSB4Y	3'UTR	0.0292134	-0.00983525	0.0719466	1	Not included	Not included	Not included	Not included
cg08593141	chrY	15866447	+	II	chrY:15863345-15864834	S_Shore			-0.00694919	-0.0412046	0.105581	1	Included	Included	Not included	Included
cg04021548	chrY	16634027	-	II	chrY:16635739-16636047	N_Shore	NLGN4Y	TSS1500	0.0800815	0.0970514	0.0622045	0.228725	Not included	Not included	Not included	Not included
cg06247034	chrY	16634255	+	II	chrY:16635739-16636047	N_Shore	NLGN4Y;NLGN4Y	TSS1500;TSS1500	0.244004	0.219917	0.40333	8.96713e-10	Included	Included	Included	Included
cg04691144	chrY	16634373	+	II	chrY:16635739-16636047	N_Shore	NLGN4Y;NLGN4Y	TSS1500;TSS200	0.319225	0.281836	0.498972	1.44495e-16	Included	Included	Included	Included
cg01073572	chrY	16924422	+	II		OpenSea	NLGN4Y;NLGN4Y;NLGN4Y	Body;Body;Body	-0.0996012	-0.0801236	-0.281251	1	Not included	Not included	Not included	Not included
cg23834181	chrY	17567486	+	II	chrY:17567579-17568617	N_Shore			0.200559	0.170144	0.327139	1.3433e-05	Included	Included	Included	Not included
cg04792227	chrY	17568097	+	I	chrY:17567579-17568617	Island			0.0978277	0.0814303	0.109728	0.974155	Included	Included	Not included	Not included
cg00679624	chrY	17568445	+	II	chrY:17567579-17568617	Island			0.0768138	0.0674234	0.059467	1	Not included	Not included	Not included	Not included
cg20764275	chrY	17568616	+	II	chrY:17567579-17568617	Island			0.0822566	0.0767088	0.0990834	1	Not included	Not included	Not included	Not included
cg01209756	chrY	19671414	+	II	chrY:19671324-19671587	Island			-0.066422	-0.0614173	-0.279985	1	Not included	Not included	Not included	Not included
cg25012987	chrY	19691491	+	II	chrY:19691214-19691762	Island	LOC401629;LOC401630	TSS200;TSS200	0.0467745	0.0386959	0.130124	1	Not included	Not included	Not included	Not included
cg16292375	chrY	19691502	+	II	chrY:19691214-19691762	Island	LOC401629;LOC401630	TSS200;TSS200	0.118279	0.114568	0.17795	0.0348031	Included	Included	Not included	Included
cg16894943	chrY	20488269	-	II	chrY:20488010-20488557	Island	LOC401630;LOC401629	TSS200;TSS200	0.0594503	0.0542648	0.131768	1	Not included	Not included	Not included	Not included
cg06060201	chrY	20488280	-	II	chrY:20488010-20488557	Island	LOC401630;LOC401629	TSS200;TSS200	0.0512317	0.04671	0.123685	1	Not included	Not included	Not included	Not included
cg04170994	chrY	20488293	-	II	chrY:20488010-20488557	Island	LOC401630;LOC401629	TSS200;TSS200	0.0498119	0.0460429	0.121077	1	Not included	Not included	Not included	Not included
cg23308414	chrY	20508362	-	II	chrY:20508190-20508452	Island			-0.07256	-0.0604501	-0.331274	1	Not included	Not included	Not included	Not included
cg26046487	chrY	20736147	-	II		OpenSea	HSFY1;HSFY2;HSFY2;HSFY1	Body;Body;Body;Body	-0.118477	-0.0656859	-0.284114	1	Included	Included	Not included	Not included
cg10691859	chrY	21041339	+	II		OpenSea	NCRNA00185	TSS1500	-0.0938919	-0.0963513	-0.439883	0.245197	Not included	Not included	Not included	Not included
cg26251715	chrY	21236229	-	II	chrY:21238448-21240005	N_Shelf	TTTY14	Body	-0.0780548	-0.0366643	-0.0133588	1	Not included	Not included	Not included	Not included
cg06628792	chrY	21240004	+	II	chrY:21238448-21240005	Island	TTTY14	TSS1500	0.22777	0.218011	0.199509	1.35816e-09	Included	Included	Included	Included
cg00121626	chrY	21664296	-	II	chrY:21664481-21665063	N_Shore	BCORL2	Body	0.128426	0.136291	0.142527	0.00228243	Included	Included	Included	Included
cg15027426	chrY	21664604	-	I	chrY:21664481-21665063	Island	BCORL2	Body	0.0531786	0.0402961	0.094139	1	Not included	Not included	Not included	Not included
cg00876332	chrY	21664717	+	II	chrY:21664481-21665063	Island	BCORL2	Body	0.1263	0.138888	0.124418	0.00160011	Included	Included	Included	Included
cg15794778	chrY	21665021	-	II	chrY:21664481-21665063	Island	BCORL2	Body	0.107953	0.123378	0.0526909	0.0121512	Included	Included	Not included	Not included
cg06231362	chrY	21726406	+	II	chrY:21729143-21729556	N_Shelf			-0.0675988	-0.0596769	-0.442905	1	Not included	Not included	Not included	Not included
cg25756647	chrY	21728575	+	I	chrY:21729143-21729556	N_Shore	CYorf15A	TSS1500	-0.0566001	-0.0677691	-0.0263806	1	Not included	Not included	Not included	Not included
cg10076560	chrY	21729144	+	I	chrY:21729143-21729556	Island	CYorf15A	TSS200	-0.0916751	-0.0807239	0.154013	1	Included	Included	Included	Included
cg10799208	chrY	22681436	-	II		OpenSea	TTTY10	TSS1500	-0.0595357	-0.0614453	-0.363435	1	Not included	Not included	Not included	Not included
cg26928789	chrY	22682393	-	II		OpenSea	TTTY10	TSS1500	-0.0677343	-0.0757121	-0.349408	1	Not included	Not included	Not included	Not included
cg09081202	chrY	22735320	-	II	chrY:22737825-22738052	N_Shelf			-0.143089	-0.158411	-0.14569	9.02582e-05	Included	Included	Not included	Not included
cg13308744	chrY	22736584	-	II	chrY:22737825-22738052	N_Shore	EIF1AY	TSS1500	-0.319658	-0.328899	-0.418731	5.03685e-23	Included	Included	Included	Included
cg00063477	chrY	22741795	+	II	chrY:22737825-22738052	S_Shelf	EIF1AY	Body	0.00539145	0.00558883	-0.0722514	1	Not included	Not included	Not included	Not included
cg10841270	chrY	22917104	+	I		OpenSea	RPS4Y2	TSS1500	-0.231044	-0.194503	-0.501308	1.66574e-07	Included	Included	Not included	Included
cg17741448	chrY	22917782	+	II		OpenSea	RPS4Y2	TSS200	-0.126082	-0.107035	-0.24664	0.0809105	Not included	Not included	Not included	Not included
cg03416979	chrY	23566288	-	II	chrY:23566571-23566864	N_Shore			-0.0130736	-0.0573792	0.242009	1	Not included	Not included	Not included	Not included
cg25918849	chrY	23753332	-	II		OpenSea	TTTY13	Body	-0.0729879	-0.0584053	-0.0395577	1	Not included	Not included	Not included	Not included
cg14273923	chrY	28555912	+	II	chrY:28555535-28555932	Island			0.110195	0.143839	-0.0634178	0.000798824	Included	Included	Not included	Not included
